***Cellulomonas zeae* sp. nov., *Lelliottia zeae* sp. nov., *Paraburkholderia zeae* sp. nov. and *Sphingomonas zeigerminis* sp. nov., four new bacterial species isolated from *Zea mays***

Sarah Seaton<sup>1</sup>, Jacqueline Lemaire<sup>1</sup>, Patrik Inderbitzin<sup>1</sup>, Victoria Knight-Connoni<sup>1</sup>,  
Martha E. Trujillo<sup>2</sup>

<sup>1</sup>Indigo Ag, Inc., 500 Rutherford Avenue, Boston, MA 02129, United States

<sup>2</sup>Departamento de Microbiología y Genética, Campus Miguel de Unamuno,  
University of Salamanca, Salamanca, Spain

## ABSTRACT

Four novel bacterial species collected in the United States from healthy tissues of corn plants are described. These include *Cellulomonas zeae* sp. nov. and *Lelliottia zeae* sp. nov. from Indiana, *Paraburkholderia zeae* sp. nov. from Iowa, and *Sphingomonas zeigerminis* sp. nov. from Mississippi.

## INTRODUCTION

Bacterial communities present in soil account for the richest reservoir of biological diversity on Earth (Berendsen et al. 2012; Finkel et al. 2017). Many rhizosphere bacteria are of great importance due to their interactions with plants (Schenk et al. 2012), and this complex plant-associated microbial community is for the most part beneficial to the plant (Berendsen et al. 2012). Despite the importance of microorganisms for plants, these extremely complex microbial communities have remained largely uncharacterized (Schenk et al. 2012).

Maize (*Zea mays* L.) is one of the most prevalent and economically important cereal crops worldwide used for human consumption, animal feed and as a raw material for energy production (Byrt et al. 2011). Maize is home to a rich diversity of plant-associated microorganisms that collectively account for roughly twenty times as many genes as the maize genome itself (Wallace and May 2018). Plant-associated microorganisms are increasingly being used for biotechnological applications, including biological control of

plant pathogens, plant growth promotion, or isolation of active compounds (Ryan et al. 2008; Glick 2012; Bouizgarne 2013; Dey et al. 2014). Recent studies have focused on the culturable bacterial communities in corn, reporting that the most abundant bacteria linked to this plant belong to Firmicutes and  $\gamma$ -Proteobacteria, with the genera *Bacillus* and *Pseudomonas* the most frequently isolated microbes (Qaisrani et al. 2019). In addition, members of the Actinobacteria and Bacteroides have also been reported.

Four strains with identification numbers JL103, JL109, PI101 and SS104 were isolated from healthy corn tissues collected in Indiana, Iowa and Mississippi in the United States. The strains were characterized using molecular and phenotypic tests to determine their taxonomic placement. Our results indicate that the new strains represent four new species of the genera *Cellulomonas*, *Lelliottia*, *Paraburkholderia* and *Sphingomonas*, and we propose the names *Cellulomonas zae* sp. nov. (JL103), *Lelliottia zae* sp. nov. (SS104), *Paraburkholderia zae* sp. nov. (PI101) and *Sphingomonas zeigerminis* sp. nov. (JL109).

## METHODS

**Isolation.** Strains JL103, SS104 and JL109 were sourced from healthy field-grown *Zea mays* in Indiana, USA (JL103 and SS104) or Mississippi, USA (JL109). PI101 was isolated from ground, surface-sterilized seeds of an ancient land race *Zea mays*. Seeds were obtained from the North Central Regional Plant Introduction Station, Ames, Iowa. Plant tissue was washed with a mild detergent to remove particulates, surface-sterilized with bleach and ethanol, and homogenized. Serial dilutions of tissue homogenate were plated on a panel of media types for endophyte cultivation. Strain JL103, a small (0.7 mm diameter), pale yellow colony, arose on R2A after 5 days of incubation at 24°C. JL109, a bright yellow-pigmented, and PI101, a matte-white colony type, arose on Starch Casein agar after 7 and 3 days of incubation at 24°C, respectively. SS104 was isolated as a non-descript cream-colored colony on Potato Dextrose Agar. All strains were streaked to purity and stored in glycerol (20% v/v) at -80°C until subjected to further testing.

**Motility.** The strains were tested for flagellar-dependent swimming and swarming motility on R2A plates solidified with 0.3% and 0.6% agar, respectively. Three independent colonies were inoculated onto R2A broth and grown for 36 hr at 24°C. Broth cultures were

normalized to an OD600 of 0.1, and 1.5  $\mu$ l of culture was spotted directly onto the surface of the motility agar. The diameter of colony expansion was measured for 5 days.

**Carbon source utilization.** Substrate utilization was assessed using Biolog GenIII Microplates (Catalogue No. 1030) (Biolog Inc., Hayward, CA). Each bacterium was inoculated in duplicate plates using Protocol A, described by the manufacturer, with the exception that plates were incubated at 30°C. Respiration leading to reduction of the tetrazolium indicator was measured by absorbance at 590 nm.

**Biochemical analyses.** Catalase activity was evaluated by immediate effervescence after the application of 3% (v/v) hydrogen peroxide solution via the tube method, a positive reaction was indicated by the production of bubbles. *Staphylococcus aureus* NCIMB 12702 and *Streptococcus pyogenes* ATCC 19615 were used as positive and negative controls, respectively. Oxidase activity was evaluated via the oxidation of Kovács oxidase reagent, 1% (w/v) tetra-methyl-p-phenylenediamine dihydrochloride in water, via the filter-paper spot method. A positive reaction was indicated when the microorganisms color changed to dark purple. *Pseudomonas aeruginosa* NCIMB 12469 and *Escherichia coli* ATCC 25922 were used as positive and negative controls, respectively. Urease activity was evaluated via the hydrolysis of urea in Christensen's Urea Agar, using phenol red as a pH indicator. *Proteus hauseri* ATCC 13315 and *Escherichia coli* ATCC 25922 were used as positive and negative controls, respectively.

**Phylogenetic and genomic analyses.** DNA was extracted from pure cultures using the Omega Mag-Bind Universal Pathogen Kit according to manufacturer's protocol with a final elution volume of 60 $\mu$ l (Omega Biotek Inc., Norcross, GA). DNA samples were quantified using Qubit fluorometer (ThermoFisher Scientific, Waltham, MA) and normalized to 100 ng. DNA was prepped using Nextera DNA Flex Library Prep kit according to manufacturer's instructions (Illumina Inc., San Diego, CA). DNA libraries were quantified via qPCR using KAPA Library Quantification kit (Roche Sequencing and Life Science, Wilmington, MA) and combined in equimolar concentrations into one 24-sample pool. Libraries were sequenced on a MiSeq using pair-end reads (2x200bp). Reads were trimmed of adapters and low-quality bases using Cutadapt (version 1.9.1) and assembled into contigs using MEGAHIT (version 1.1.2) (Li et al. 2015). Reads were

mapped to contigs using Bowtie2 (version 2.3.4) (Langmead and Salzberg 2012), and contigs were assembled into scaffolds using BESST (2.2.8) (Sahlin et al. 2014).

Average nucleotide identity analyses were performed using the pyani ANIm algorithm (Richter and Rosselló-Móra 2009) implemented in the MUMmer package (Kurtz et al. 2004) retrieved from <https://github.com/widdowquinn/pyani>.

16S rRNA gene sequences were extracted from genome assemblies using barrnap (Seemann 2019), and 16S rRNA gene phylogenetic analyses were performed using FastTree (Price et al. 2010) using a General Time Reversible substitution model. Taxon sampling for each species is described in the respective phylogenetic tree figure legend. GenBank accession numbers are provided in the phylogenetic tree figures.

## RESULTS

### Phylogenetic and genomic analyses

#### *Cellulomonas zeae* sp. nov. strain JL103

Strain JL103 shared 99.3% 16S rRNA gene sequence identity with *Cellulomonas humilata* ATCC 25174<sup>T</sup>, followed by *Cellulomonas xylanilytica* XIL 11<sup>T</sup> (99.2%) and shared less than 98% sequence similarity with the remaining *Cellulomonas* species. A phylogenetic tree using FastTree (Price et al. 2010) confirmed the affiliation of strain JL103 to the genus *Cellulomonas*. JL103 formed a monophyletic group with the species *C. humilata* and *C. xylanilytica* supported by high bootstrap support (Figure 1) and showing that it could be distinguished from its phylogenetic neighbors. Average nucleotide identity (ANI) values between *C. humilata* ATCC 25174<sup>T</sup>, *C. xylanilytica* NBRC 101102<sup>T</sup> and the new isolate was 86.7 and 86.5%, respectively. Their values are well below the threshold for species demarcation (Richter and Rosselló-Móra 2009; Chun et al. 2018) providing further genomic support that strain JL103 represents a new genomic species of *Cellulomonas*.

#### *Lelliottia zeae* sp. nov. strain SS104

16S rRNA sequence identity between strain SS104 and the type strains *Lelliottia amnigena* JCM1237<sup>T</sup>, *Lelliottia jeotgali* PFL01<sup>T</sup> and *Lelliottia nimipressuralis* LMG 10245<sup>T</sup> were 99.5%, 98.9% and 98.3%, respectively. The phylogenetic position of SS104 suggested allocation to the genus *Lelliottia* (Figure 2). Strain SS104 formed a monophyletic

group with *Lelliottia amnigena*, supported by bootstrap support of 88% (Figure 2). The two top ANI hits were to genomes of *Lelliottia amnigena* and *Lelliottia jeotgali* with 93.7% and 86.0%, respectively. These results indicate that strain SS104 represents a new genomic species of *Lelliottia*.

*Paraburkholderia zae* sp. nov. strain PI101

16S rRNA sequence identity between strain PI101 and the type strains *Paraburkholderia strydomiana* WK1f<sup>T</sup> and *Paraburkholderia aromaticivorans* BN5<sup>T</sup> were 98.5% and 98.3%, respectively. The phylogenetic position of SS104 suggested allocation to the genus *Paraburkholderia* (Figure 3). Strain PI101 formed a monophyletic group with the type strain *Paraburkholderia sediminicola* HU2-65W<sup>T</sup>, supported by bootstrap support of 91% (Figure 3). The two top ANI hits were to the genome of *Paraburkholderia aromaticivorans* and the genome of the type strain *Paraburkholderia xenovorans* LB400<sup>T</sup> with 91.5% and 90.8%, respectively. These results indicate that strain PI101 represents a new genomic species of *Paraburkholderia*.

*Sphingomonas zeigerminis* sp. nov. strain JL109

The strain JL109 16S rRNA was 100% identical to *Sphingomonas trueperi* NBRC 100456<sup>T</sup>. The phylogenetic position of JL109 confirmed its allocation in the genus *Sphingomonas* (Figure 4) and was most closely related to *S. trueperi*, *Sphingomonas azotifigens* Y39<sup>T</sup> and *Sphingomonas pituitosa* DSM 13101<sup>T</sup> (Figure 4). ANI values between the genome sequence of isolate JL109 and the related species *S. azotifigens*, *S. pituitosa* and *S. trueperi* were 89.8%, 89.4% and 92.2%, respectively. These results indicate that strain JL109 represents a new genomic species of *Sphingomonas*.

**Morphology, physiology and biochemical characteristics**

*Cellulomonas zae* sp. nov. strain JL103

Cells of strain JL103 stained Gram-positive and were non-spore forming rod-shaped with an average cell size of 0.4 µm wide and 1.3-1.5 µm long. They grew as single cells or in pairs (Figure 5) but no motility or swarming was observed. These characteristics are consistent with the description of the genus *Cellulomonas* (Stackebrandt and Schumann

2012). Good growth was observed on nutrient agar (NA), tryptic soy agar (TSA) and R2A agars at 30°C after 7 days. Abundant growth was observed on R2A after 48 hrs. On this medium the strain also produced an exopolysaccharide. Colonies were pale yellow, circular and entire. Except for R2A agar, growth at 22°C was weak on these media. The strain is also able to grow in the presence of 4% NaCl, unlike *C. humilata* ATCC 25174<sup>T</sup>. Other differential characteristics between JL103 and the species *C. humilata* and *C. xylanilytica* are found in Table 1. Additional physiological characteristics are found in the species description.

*Lelliottia zae* sp. nov. strain SS104

Cells stained Gram-negative, were rod-shaped and measured 0.8-1 µm wide and 2 µm long (Figure 6). They were motile by swimming and did not produce spores. Colonies had a cream color and were circular, smooth and raised. Good growth was observed after 24 h on TSA, NA and R2A, at 22 and 30°C. Similar to other *Lelliottia* species, the new strain is catalase negative and oxidase positive, but unlike its closest phylogenetic neighbor, *L. amnigena*, *L. zae* SS104 does not produce urease. Temperature is also useful to differentiate between *L. zae* and the species *L. jeotgali* and *L. amnigena*. The new strain grows at 41°C but not at 45°C, while *L. jeotgali* grows at both temperatures and *L. amnigena* does not show any growth at these temperatures. Additional differential characteristics based on carbon source assimilation are found in Table 2.

*Paraburkholderia zae* sp. nov. strain PI101

Cells of PI101 are Gram stain-negative, straight or slightly curved non-spore forming rods. Cell size ranges from 0.5-1.2 µm in width and 1.2 to 3.0 µm in length (Figure 7). Motility, which is characteristic of *Paraburkholderia* species, was observed on 0.3% agar. Good growth at 22 and 30°C is observed after 24 h on NA, TSA and R2A agars, with exopolysaccharide production on the latter medium. On these media, colonies were white, round, and smooth. The new strain produced catalase and oxidase; these enzymes are also produced by its phylogenetic neighbors, *P. aromaticivorans*, *P. strydomiana* and *P. caledonica*, except that *P. caledonica* is negative for oxidase. Interestingly, only *P. zae*, PI101, produced urease. Other physiological characteristics, including assimilation of

several carbon sources and comparison with its phylogenetic neighbors are found in Table 3.

*Sphingomonas zeigerminis* sp. nov. strain JL109

Cells of strain JL109 stained Gram-negative, and are slightly curved or ovoid rod shape. Cell size ranges from 0.3-1.2  $\mu\text{m}$  x 0.5 -3.0  $\mu\text{m}$  (Figure 8). Colonies were wrinkled, entire, raised and bright yellow on Nutrient Agar. The new strain was motile by flagella and strictly aerobic, with an oxidative metabolism. Growth was good between 30-37 °C, weak in the presence of 1% (w/v) NaCl and did not grow below pH 6. The new strain produced oxidase as many other *Sphingomonas* species. Catalase production and use of acetate can be used to differentiate strain JL109 from *S. azotifigens* Y39<sup>T</sup>, *S. pituitosa* DSM 13101<sup>T</sup> and *S. trueperi* NBRC 100456<sup>T</sup>. Table 4 presents a list of additional characteristics that can be useful to differentiate strain JL109 from its closest phylogenetic neighbors. In addition, a detailed description of other physiological characteristics is given in the species protologue.

#### **DESCRIPTION OF CELLULOMONAS ZEAЕ SP. NOV.**

*Cellulomonas zeae* sp. nov. *zeae*, ze'ae. L fem. n. *zeae* of *Zea* (maize), isolated from *Zea mays*

Cells are Gram-stain positive, non-flagellated, non-sporeforming, coccoid or rod-shaped cells (1.3-1.5  $\mu\text{m}$  x 0.4  $\mu\text{m}$ ). growth is aerobic or facultatively anaerobic and chemo-organotrophic. Colonies on R2A and NA are pale yellow, smooth, circular, entire. Good growth on R2A agar after 48 hrs and 30°C. EPS is produced on R2A. Aerial mycelium is not produced. Cells grow between 24-37°C (optimum 30°C); grows at pH 6-7 but not at pH 5. *C. zeae* grows in the presence of 0-7% (w/v) NaCl and is catalase and oxidase negative. Substrates used as carbon sources include dextrin, maltose, D-trehalose, D-cellobiose, D-turanose, stachyose, D-raffinose, D-melibiose, D-salicin,  $\alpha$ -D-glucose, D-mannose, D-fructose, D-galactose, L-rhamnose, L-acetoacetic acid.



The type strain is resistant to the following antibiotics: troleandomycin, rifamycin sv, minocycline, lincomycin, vancomycin, nalidixic acid and aztreonam.

The type strain, JL103<sup>T</sup>, was isolated from corn roots collected in Indiana, USA.

#### **DESCRIPTION OF LELLIOTTIA ZEAЕ SP. NOV.**

*Lelliottia zeaе* sp. nov. *zeaе*, ze'ae. L fem. n. *zeaе* of *Zea* (maize), isolated from *Zea mays*

This strain is a Gram-stain negative, non-sporeforming, motile rod (0.8-1 x 2 µm). Growth is aerobic with an oxidative metabolism. Colonies on R2A agar are cream color. Growth is observed at pH 5 and 6 and in the presence of 1-4% NaCl (w/v); weak growth is observed at 8% NaCl. The following substrates are used as carbon sources: D-maltose, D-trehalose, D-cellobiose, D-gentobiose, sucrose, D-raffinose, D-melibiose, β-Methyl-D-glucoside, D-salicin, N-Acetyl-D-glucosamine, N-Acetyl- β-D-mannosamine, N-Acetyl-Neuraminic acid, α-D-glucose, D-mannose, D-fructose, D-galactose, L-rhamnose, inosine, D-mannitol, glycerol, D-glucose-PO<sub>4</sub>, D-fructose-PO<sub>4</sub>, proline, arginine, L-glutamic acid, L-serine, pectin, D-galacturonic acid, citric acid, malic acid.

The type strain is resistant to the following antibiotics: troleandomycin, rifamycin sv, lincomycin, vancomycin, and aztreoman but susceptible to minocycline and nalidixic acid.

The type strain, SS104<sup>T</sup>, was isolated from corn tissue in Indiana, USA.

#### **DESCRIPTION OF PARABURKHOLDERIA ZEAЕ SP. NOV.**

*Paraburkholderia zeaе* sp. nov. *zeaе*, ze'ae. L fem. n. *zeaе* of *Zea* (maize), isolated from *Zea mays*

Cells are Gram-negative, motile, non-sporulating, rods (0.8 µm by 1.4 µm). The strain grows strictly aerobic using an oxidative metabolism. Colonies are white, round, and



smooth. Growth is observed at pH 5 and 6. *P. zeae* grows in the presence of 1% (w/v) NaCl, but not at 4 or 8%. The following substrates are used as carbon sources: N-acetyl-D-glucosamine, D-glucose, D-mannose, D-fructose, D-galactose, D-fucose, L-fucose, L-rhamnose, D-sorbitol, D-mannitol, D-arabitol, *myo*-inositol, glycerol, D-glucose-PO<sub>4</sub>, D-fructose-PO<sub>4</sub>, glycyl-L-proline, L-alanine, L-arginine, L-glutamic acid, L-histidine, L-serine, D-gluconic acid, D-glucuronic acid, quinic acid, p-hydroxy-phenylacetic acid, methyl pyruvate, L-lactic acid, L-malic acid,  $\gamma$ -amino-butyric acid,  $\beta$ -hydroxyl-D,L-butyric acid.

The type strain is resistant to rifamycin sv, lincomycin, vancomycin, and aztreoman, but susceptible to minocycline, and nalidixic acid.

The type strain, PI101<sup>T</sup> was isolated from corn seeds, Iowa, USA.

#### **DESCRIPTION OF SPHINGOMONAS ZEIGERMINIS SP. NOV.**

*Sphingomonas zeigerminis* (ze.i.ger'mi.nis. L. fem. n. zea spelt and the generic name of corn (*Zea*); L. neut. n. germen a sprout; N.L. gen. n. zeigerminis of a corn seedling).

Cells are Gram-stain negative, motile, non-spore forming rods. Slightly curved or ovoid rods. Bright yellow, wrinkled, entire and raised colonies. Good growth is obtained at 30°C and pH 7. Weak growth is observed on 1% NaCl. The following substrates are used as carbon sources: dextrin, D-maltose, D-trehalose, D-cellobiose, gentobiose, sucrose,  $\alpha$ -lactose,  $\alpha$ -D-glucose, D-mannose, D-galactose, sodium lactate, L-galactonic acid lactone, D-glucuronic acid and L-malic acid. Weak growth on turanose, D-melibiose, N-acetyl-D-glucosamine, N-acetyl-D-galactosamine, DL-fucose, pectin, D-galacturonic acid, L-malic acid and Tween 40. No growth on stachyose, D-raffinose, D-salicin, D-fructose, 3-methyl-glucose, L-rhamnose, inosine, D-serine, D-sorbitol, D-mannitol, D-arabitol, *myo*-inositol, glycerol, D-aspartic acid, D-serine. Gelatin is not hydrolyzed, but pectin is weakly degraded.

The type strain is resistant to lincomycin, troleandomycin, rifamycin SV, nalidixic acid and aztreonam. Sensitive to vancomycin.

The type strain, JL109<sup>T</sup>, was isolated from corn tissue in Mississippi, USA.

## ACKNOWLEDGEMENTS

We would like to thank Professor Aharon Oren, The Hebrew University of Jerusalem, for help with nomenclature.

## REFERENCES

- Berendsen, R. L., Pieterse, C. M., and Bakker, P. A. 2012. The rhizosphere microbiome and plant health. *Trends Plant Sci.* 17:478–486.
- Beukes, C. W., Steenkamp, E. T., Van Zyl, E., Avontuur, J., Chan, W. Y., Hassen, A. I., et al. 2019. *Paraburkholderia strydomiana* sp. nov. and *Paraburkholderia steynii* sp. nov.: rhizobial symbionts of the fynbos legume *Hypocalyptus sophoroides*. *Antonie Van Leeuwenhoek.* 112:1369–1385.
- Bouizgarne, B. 2013. Bacteria for plant growth promotion and disease management. In *Bacteria in Agrobiolgy: Disease Management*, Springer, p. 15–47.
- Byrt, C. S., Grof, C. P., and Furbank, R. T. 2011. C4 Plants as biofuel feedstocks: optimising biomass production and feedstock quality from a lignocellulosic perspective free access. *J. Integr. Plant Biol.* 53:120–135.
- Chun, J., Oren, A., Ventosa, A., Christensen, H., Arahal, D. R., da Costa, M. S., et al. 2018. Proposed minimal standards for the use of genome data for the taxonomy of prokaryotes. *Int. J. Syst. Evol. Microbiol.* 68:461–466.
- Coenye, T., Laevens, S., Willems, A., Ohlén, M., Hannant, W., Govan, J., et al. 2001. *Burkholderia fungorum* sp. nov. and *Burkholderia caledonica* sp. nov., two new species isolated from the environment, animals and human clinical samples. *Int. J. Syst. Evol. Microbiol.* 51:1099–1107.
- Collins, M. D., and Pascual, C. 2000. Reclassification of *Actinomyces humiferus* (Gledhill and Casida) as *Cellulomonas humilata* nom. corrig., comb. nov. *Int. J. Syst. Evol. Microbiol.* 50:661–663.
- Denner, E., Paukner, S., Kämpfer, P., Moore, E., Abraham, W.-R., Busse, H.-J., et al. 2001. *Sphingomonas pituitosa* sp. nov., an exopolysaccharide-producing bacterium that secretes an unusual type of sphingan. *Int. J. Syst. Evol. Microbiol.* 51:827–841.
- Dey, R., Pal, K. K., and Tilak, K. 2014. Plant growth promoting rhizobacteria in crop protection and challenges. In *Future Challenges in Crop Protection Against Fungal Pathogens*, Springer, p. 31–58.
- Finkel, O. M., Castrillo, G., Paredes, S. H., González, I. S., and Dangl, J. L. 2017. Understanding and exploiting plant beneficial microbes. *Curr. Opin. Plant Biol.* 38:155–163.

- Glick, B. R. 2012. Plant growth-promoting bacteria: mechanisms and applications. Scientifica. 2012.
- Izard, D., Gavini, F., Trinel, P., and Leclerc, H. 1981. Deoxyribonucleic acid relatedness between *Enterobacter cloacae* and *Enterobacter amnigenus* sp. nov. Int. J. Syst. Evol. Microbiol. 31:35–42.
- Kämpfer, P., Denner, E. B., Meyer, S., Moore, E. R., and Busse, H.-J. 1997. Classification of “*Pseudomonas azotocolligans*” Anderson 1955, 132, in the genus *Sphingomonas* as *Sphingomonas trueperi* sp. nov. Int. J. Syst. Evol. Microbiol. 47:577–583.
- Kurtz, S., Phillippy, A., Delcher, A. L., Smoot, M., Shumway, M., Antonescu, C., et al. 2004. Versatile and open software for comparing large genomes. Genome Biol. 5:R12.
- Langmead, B., and Salzberg, S. L. 2012. Fast gapped-read alignment with bowtie 2. Nat Methods. 9 Available at: <https://doi.org/10.1038/nmeth.1923>.
- Lee, Y., and Jeon, C. O. 2018. *Paraburkholderia aromaticivorans* sp. nov., an aromatic hydrocarbon-degrading bacterium, isolated from gasoline-contaminated soil. Int. J. Syst. Evol. Microbiol. 68:1251–1257.
- Li, D., Liu, C.-M., Luo, R., Sadakane, K., and Lam, T.-W. 2015. MEGAHIT: an ultra-fast single-node solution for large and complex metagenomics assembly via succinct de Bruijn graph. Bioinformatics. 31:1674–1676.
- Liu, S., Tang, Y., Wang, D., Lin, N., and Zhou, J. 2016. Identification and characterization of a new *Enterobacter* onion bulb decay caused by *Lelliottia amnigena* in China. App Micro Open Access. 2:114.
- Price, M. N., Dehal, P. S., and Arkin, A. P. 2010. FastTree 2 - approximately maximum-likelihood trees for large alignments. PLoS ONE. 5:e9490.
- Qaisrani, M. M., Zaheer, A., Mirza, M. S., Naqqash, T., Qaisrani, T. B., Hanif, M. K., et al. 2019. A comparative study of bacterial diversity based on culturable and culture-independent techniques in the rhizosphere of maize (*Zea mays* L.). Saudi J. Biol. Sci. 26:1344–1351.
- Richter, M., and Rosselló-Móra, R. 2009. Shifting the genomic gold standard for the prokaryotic species definition. Proc. Natl. Acad. Sci. 106:19126–19131.
- Rivas, R., Trujillo, M. E., Mateos, P., Martinez-Molina, E., and Velazquez, E. 2004. *Cellulomonas xylanilytica* sp. nov., a cellulolytic and xylanolytic bacterium isolated from a decayed elm tree. Int. J. Syst. Evol. Microbiol. 54:533–536.
- Ryan, R. P., Germaine, K., Franks, A., Ryan, D. J., and Dowling, D. N. 2008. Bacterial endophytes: recent developments and applications. FEMS Microbiol. Lett. 278:1–9.
- Sahlin, K., Vezzi, F., Nystedt, B., Lundeberg, J., and Arvestad, L. 2014. BESST-efficient scaffolding of large fragmented assemblies. BMC Bioinformatics. 15:281.
- Schenk, P. M., Carvalhais, L. C., and Kazan, K. 2012. Unraveling plant-microbe interactions: can multi-species transcriptomics help? Trends Biotechnol. 30:177–184.
- Seemann, T. 2019. *barrnap 0.9: rapid ribosomal RNA prediction*. Available at: <https://github.com/tseemann/barrnap>.
- Stackebrandt, E., and Schumann, P. 2012. *Cellulomonas*. In *Bergey’s Manual of Systematics of Archaea and Bacteria*, eds. W. B. Whiteman, Fred A Rainey, Peter Kämpfer, Martha E Trujillo, J. Chun, P DeVos, et al. Wiley.
- Wallace, J. G., and May, G. 2018. Endophytes: The other maize genome. In *The Maize Genome. Compendium of Plant Genomes*, eds. J Bennetzen, S Flint-Garcia, C Hirsch, and R Tuberosa. Cham: Springer, p. 213–246.

Xie, C.-H., and Yokota, A. 2006. *Sphingomonas azotifigens* sp. nov., a nitrogen-fixing bacterium isolated from the roots of *Oryza sativa*. *Int. J. Syst. Evol. Microbiol.* 56:889–893.

Yoon, M.-H., Ten, L. N., Im, W.-T., and Lee, S.-T. 2008. *Cellulomonas chitinilytica* sp. nov., a chitinolytic bacterium isolated from cattle-farm compost. *Int. J. Syst. Evol. Microbiol.* 58:1878–1884.

Yuk, K.-J., Kim, Y.-T., Huh, C.-S., and Lee, J.-H. 2018. *Lelliottia jeotgali* sp. nov., isolated from a traditional Korean fermented clam. *Int. J. Syst. Evol. Microbiol.* Available at: <http://ijs.microbiologyresearch.org/content/journal/ijsem/10.1099/ijsem.0.002737.v1>.

## FIGURES AND TABLES

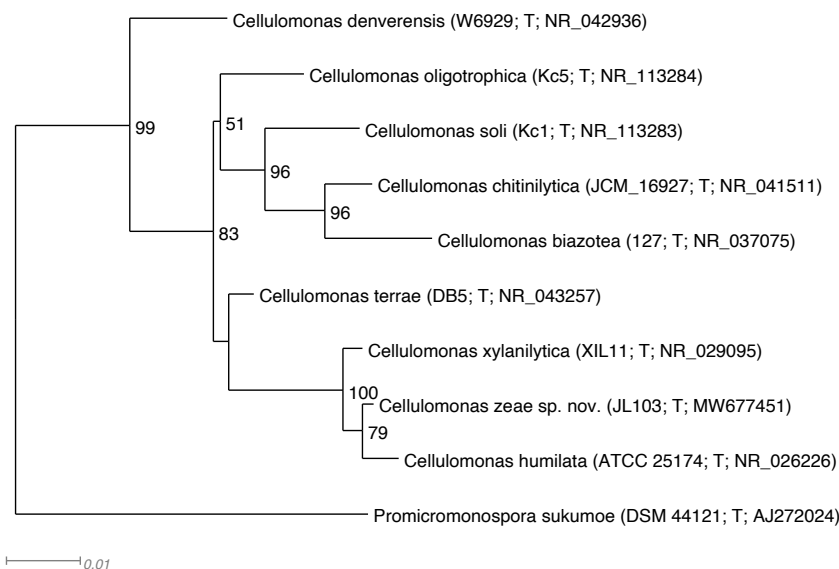

**Figure 1.** Phylogenetic 16S tree of *Cellulomonas zeae* sp. nov. and relatives generated using FastTree (Price et al. 2010). The eight valid species with the highest 16S identities to *C. zeae* were included in the tree, the tree is rooted with *Promicromonospora sukumoe*. Strain numbers and GenBank accession numbers follow species names, T stands for ‘type’. Support values above 50% are given by the branches. *Cellulomonas zeae* is most closely related to *C. humilata* and *C. xylanilytica* with 100% support. Branch lengths are proportional to the changes along the branches, a scale bar is provided at the bottom.

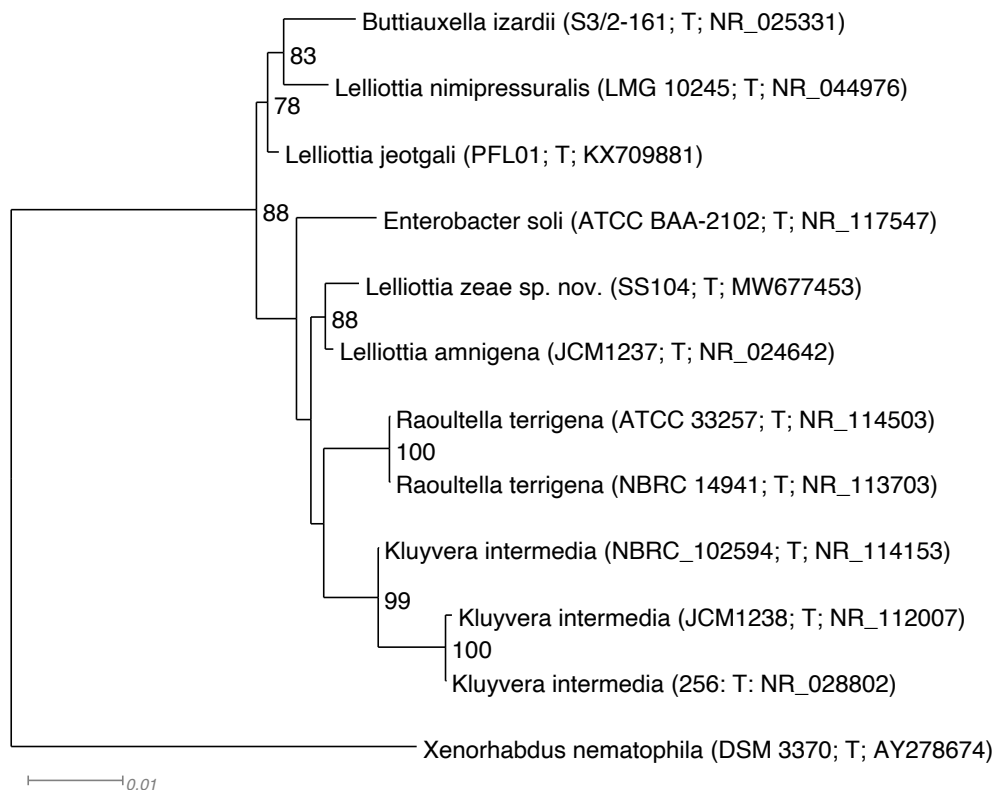

**Figure 2.** Phylogenetic 16S tree of *Lelliottia zae* sp. nov. and relatives generated using FastTree (Price et al. 2010). The 10 valid s with the highest 16S identities to *L. zae* were included in the tree, the tree is rooted with *Xenorhabdus nematophila*. Strain numbers and GenBank accession numbers follow species names, T stands for ‘type’. Support values above 70% are given by the branches. *Lelliottia zae* is most closely related to *Lelliottia amnigena* with 88% support. Branch lengths are proportional to the changes along the branches, a scale bar is provided at the bottom.

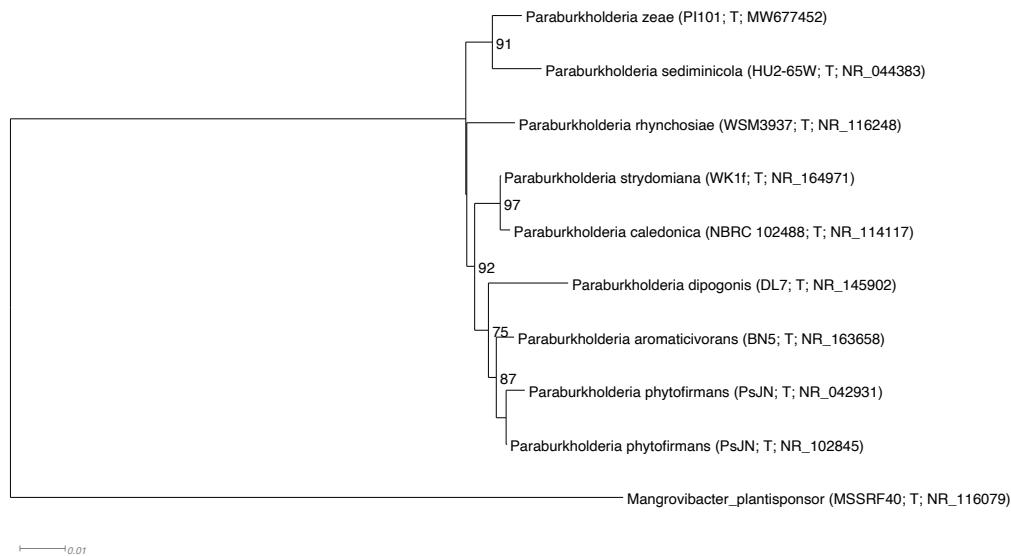

**Figure 3.** Phylogenetic 16S tree of *Paraburkholderia zae* sp. nov. and relatives generated using FastTree (Price et al. 2010). The 8 valid entries with the highest 16S identities to *P. zae* were included in the tree, the tree is rooted with *Mangrovibacter plantisponsor*. Strain numbers and GenBank accession numbers follow species names, T stands for ‘type’. Support values above 70% are given by the branches. *Paraburkholderia zae* is most closely related to *Paraburkholderia sediminicola* with 91% support. Branch lengths are proportional to the changes along the branches, a scale bar is provided at the bottom.

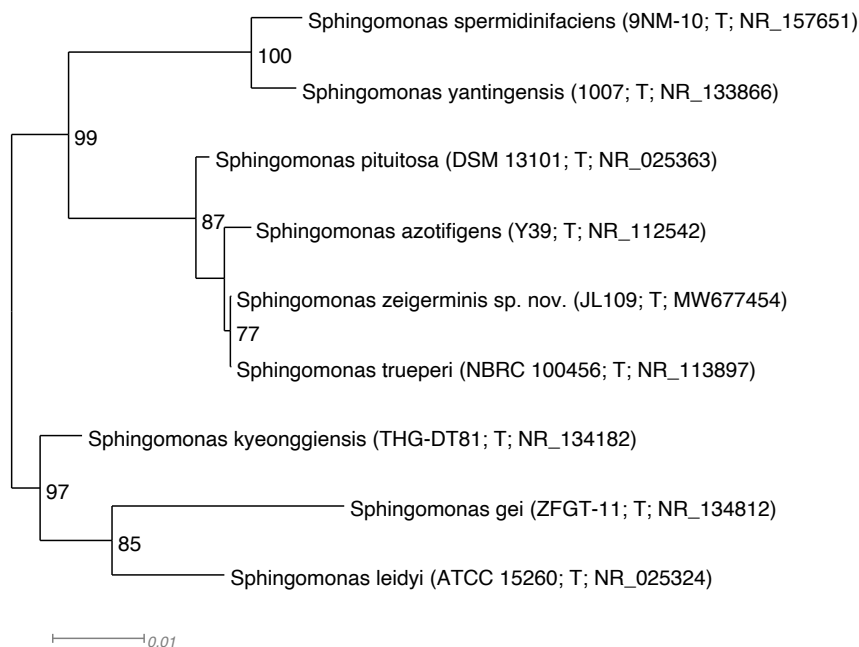

**Figure 4.** Phylogenetic 16S tree of *Sphingomonas zeigerminis* sp. nov. and relatives generated using FastTree (Price et al. 2010). The eight valid species with the highest 16S identities to *S. zeigerminis* were included in the tree that was midpoint-rooted. Strain numbers and GenBank accession numbers follow species names, T stands for ‘type’. Support values above 70% are given by the branches. *Sphingomonas zeigerminis* is most closely related to *S. trueperi*, *S. azotifigens* and *S. pituitosa* with 87% support. Branch lengths are proportional to the changes along the branches, a scale bar is provided at the bottom.



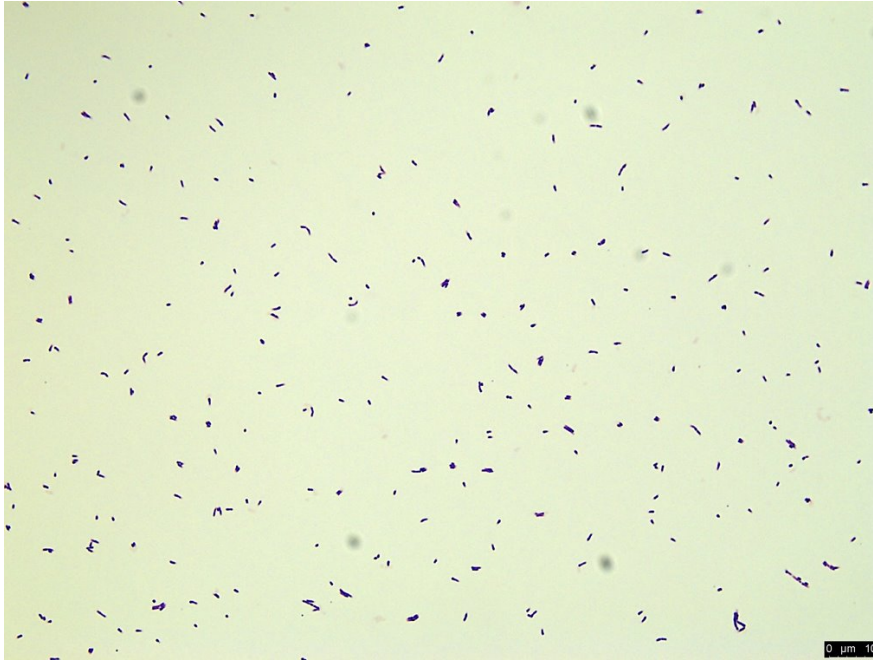

**Figure 5.** Morphology of *Cellulomonas zeae* sp. nov. JL103 depicted following Gram stain under bright field microscopy. Bar = 10  $\mu$ m

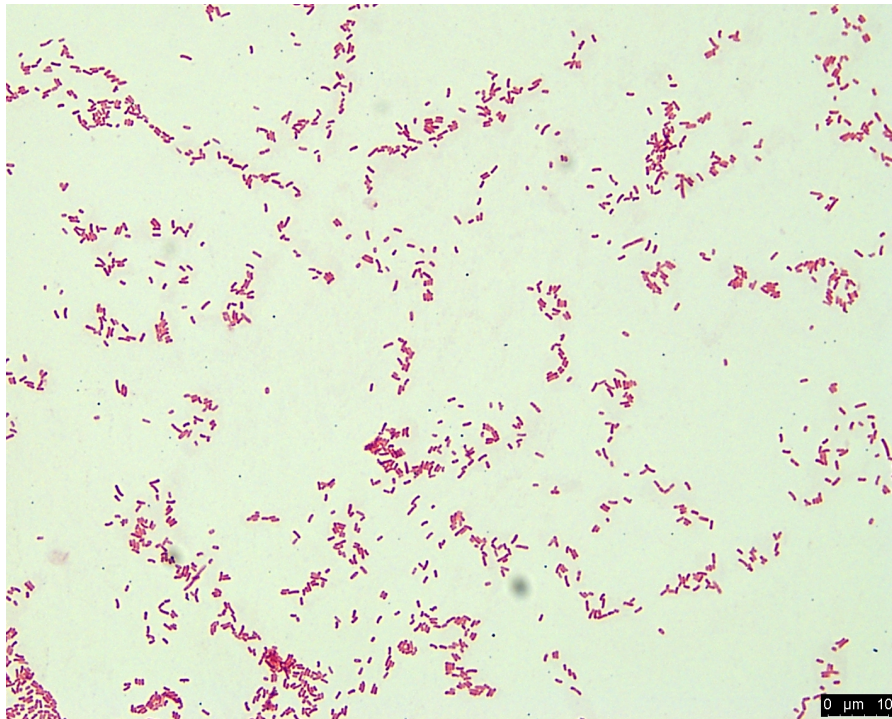

**Figure 6.** Morphology of *Lelliottia zeae* sp. nov. strain SS104 depicted following Gram stain using bright field microscopy. Bar = 10  $\mu$ m.

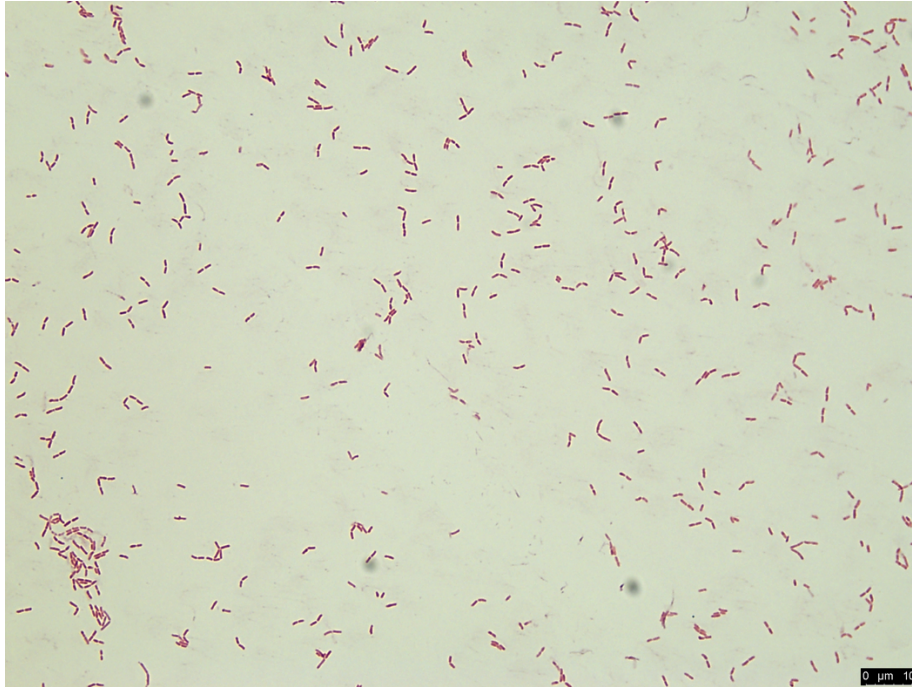

**Figure 7.** Morphology of *Paraburkholderia zae* sp. nov. strain PI101 depicted following Gram stain using bright field microscopy. Bar = 10 μm.

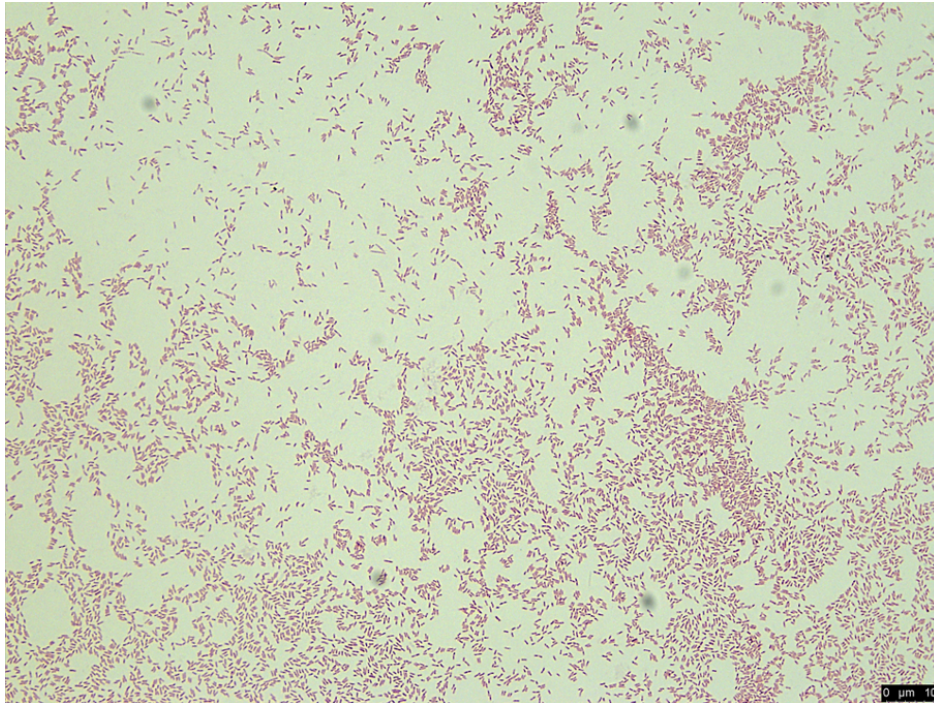

**Figure 8.** Morphology of *Sphingomonas zeigerminis* JL109 depicted following Gram stain and under bright field microscopy. Bar = 10 μm.

**Table 1.** Physiological characteristics of *Cellulomonas zeae* sp. nov. strain JL103 and related *Cellulomonas* species.

|                                 | <i>C. zeae</i> JL103 <sup>T</sup> | <i>C. xylanilytica</i><br>XIL 11 <sup>T</sup> | <i>C. humilata</i><br>ATCC 25174 <sup>T</sup> |
|---------------------------------|-----------------------------------|-----------------------------------------------|-----------------------------------------------|
| <b>General characteristics:</b> |                                   |                                               |                                               |
| <b>Colony morphology</b>        | Pale yellow, smooth, no mycelium  | Lemon yellow, smooth, no mycelium             | White, with branching mycelium                |
| <b>Growth at 30°C</b>           | +                                 | +                                             | +                                             |
| <b>Growth at 37°C</b>           | -                                 | +                                             | Poor to no growth                             |
| <b>Growth with 4% NaCl</b>      | +                                 | nr                                            | -                                             |
| <b>Motility</b>                 | -                                 | -                                             | -                                             |
| <b>Oxidase</b>                  | -                                 | +                                             | -                                             |
| <b>Catalase</b>                 | -                                 | +                                             | -                                             |
| <b>Utilization of:</b>          |                                   |                                               |                                               |
| <b>Acetate</b>                  | -                                 | -                                             | -                                             |
| <b>Gluconate</b>                | -                                 | -                                             | +                                             |
| <b>D-Lactose</b>                | -                                 | +                                             | +                                             |
| <b>Lactate</b>                  | -                                 | -                                             | -                                             |
| <b>D-Mannose</b>                | +                                 | +                                             | +                                             |
| <b>D-Mannitol</b>               | -                                 | -                                             | +                                             |
| <b>L-Rhamnose</b>               | w                                 | +                                             | +                                             |
| <b>Gentiobiose</b>              | -                                 | +                                             | nr                                            |
| <b>Maltose</b>                  | +                                 | +                                             | nr                                            |
| <b>N-Acetyl-D-Glucosamine</b>   | -                                 | +                                             | nr                                            |

+, Positive; w, Weakly positive; -, Negative; nr, Not reported

Data from: Collins and Pascual (2000); Rivas et al. (2004); Yoon et al. (2008)



**Table 2.** Physiological characteristics of *L. zea* and related *Lelliottia* species.

|                                 | <i>L. zea</i> SS104 <sup>T</sup> | <i>L. jeotgali</i> PFL01 <sup>T</sup> | <i>L. amnigena</i> LGM 2784 <sup>T</sup> |
|---------------------------------|----------------------------------|---------------------------------------|------------------------------------------|
| <b>General characteristics:</b> |                                  |                                       |                                          |
| <b>Colony morphology</b>        | Non-pigmented; circular, smooth  | Beige; irregularly circular, smooth   | Non-pigmented; circular, smooth          |
| <b>Growth at 37°C</b>           | +                                | +                                     | +                                        |
| <b>Growth at 41°C</b>           | +                                | +                                     | -                                        |
| <b>Growth at 45°C</b>           | -                                | +                                     | -                                        |
| <b>Motility</b>                 | +                                | +                                     | +                                        |
| <b>Oxidase</b>                  | -                                | -                                     | -                                        |
| <b>Catalase</b>                 | +                                | +                                     | +                                        |
| <b>Urease</b>                   | -                                | nr                                    | +                                        |
| <b>Utilization of:</b>          |                                  |                                       |                                          |
| <b>N-Acetyl-Glucosamine</b>     | +                                | +                                     | +                                        |
| <b>N-Acetyl-D-Galactosamine</b> | -                                | nr                                    | +                                        |
| <b>D-Arabitol</b>               | -                                | -                                     | -                                        |
| <b>m-Inositol</b>               | -                                | -                                     | -                                        |
| <b>Lactose</b>                  | w                                | -                                     | +                                        |
| <b>D-Sucrose</b>                | +                                | -                                     | -                                        |
| <b>D-Sorbitol</b>               | -                                | -                                     | +                                        |
| <b>Glycerol</b>                 | +                                | +                                     | -                                        |

+, Positive; w, Weakly positive; -, Negative; nr, Not reported

Data from: Izard et al. (1981); Liu et al. (2016); Yuk et al. (2018)

**Table 3.** Physiological characteristics of *Paraburkholderia zae* and related *Paraburkholderia* species.

|                                 | <i>P.<br/>zae</i>               | <i>P.<br/>aromaticiv.</i>       | <i>P.<br/>strydomia.</i>        | <i>P.<br/>caledonica</i> |
|---------------------------------|---------------------------------|---------------------------------|---------------------------------|--------------------------|
| <b>General characteristics:</b> |                                 |                                 |                                 |                          |
| <b>Colony morphology</b>        | Non-pigmented;<br>round, smooth | Non-pigmented;<br>round, smooth | Non-pigmented;<br>round, smooth | nr                       |
| <b>Growth at 37°C</b>           | +                               | +                               | +                               | -                        |
| <b>Oxidase</b>                  | +                               | +                               | +                               | -                        |
| <b>Catalase</b>                 | +                               | +                               | +                               | +                        |
| <b>Urease</b>                   | +                               | -                               | -                               | -                        |
| <b>Utilization of:</b>          |                                 |                                 |                                 |                          |
| <b>Sucrose</b>                  | -                               | +                               | -                               | -                        |
| <b>Cellobiose</b>               | -                               | +                               | +                               | nr                       |
| <b>Melibiose</b>                | -                               | +                               | nr                              | nr                       |
| <b>Raffinose</b>                | -                               | +                               | -                               | nr                       |
| <b>D-Glucose</b>                | +                               | +                               | +                               | +                        |
| <b>Lactose</b>                  | -                               | +                               | -                               | +                        |
| <b>N-Acetyl-D-Galactosamine</b> | -                               | +                               | -                               | +                        |
| <b>N-Acetyl-D-Glucosamine</b>   | +                               | +                               | +                               | +                        |
| <b>m-inositol</b>               | +                               | +                               | -                               | +                        |
| <b>D-Mannitol</b>               | +                               | +                               | +                               | +                        |
| <b>D-Sorbitol</b>               | +                               | +                               | +                               | nr                       |
| <b>Citric acid</b>              | w                               | +                               | -                               | -                        |
| <b>Propionic acid</b>           | -                               | +                               | +                               | nr                       |
| <b>Acetic acid</b>              | -                               | nr                              | +                               | nr                       |

+, Positive; w, Weakly positive; -, Negative; nr, Not reported

Taxa: *P. zae*: *P. zae* PI101<sup>T</sup>; *P. aromaticiv.*: *P. aromaticivorans* BN5<sup>T</sup>; *P. strydomia.*: *P. strydomiana* WK1.1f<sup>T</sup>; *P. cal.*: *P. caledonica* LMG19076<sup>T</sup>

Data from: Beukes et al. (2019); Coenye et al. (2001); Lee and Jeon (2018).

**Table 4.** Physiological characteristics of *Sphingomonas zeigerminis* sp. nov. strain JL109 and related *Sphingomonas* species.

|                                 | <i>S. zeigerminis</i><br>JL109 <sup>T</sup> | <i>S. azotifigens</i><br>Y39 <sup>T</sup>          | <i>S. pituitosa</i><br>DSM<br>13101 <sup>T</sup> | <i>S. trueperi</i><br>NBRC<br>100456 <sup>T</sup> |
|---------------------------------|---------------------------------------------|----------------------------------------------------|--------------------------------------------------|---------------------------------------------------|
| <b>General characteristics:</b> |                                             |                                                    |                                                  |                                                   |
|                                 | Wrinkled, entire, raised and bright yellow  | Circular, smooth, convex, opaque and yellow-orange | Circular, smooth, entire, convex and deep yellow | Circular, smooth, entire, low convex and yellow   |
| <b>Colony morphology</b>        |                                             |                                                    |                                                  |                                                   |
| <b>Growth at 30°C</b>           | +                                           | +                                                  | +                                                | +                                                 |
| <b>Growth at 37°C</b>           | +                                           | +                                                  | -                                                | nr                                                |
| <b>Motility</b>                 | +                                           | +                                                  | +                                                | +                                                 |
| <b>Oxidase</b>                  | -                                           | +                                                  | -                                                | +                                                 |
| <b>Catalase</b>                 | +                                           | +                                                  | +                                                | +                                                 |
| <b>Urease</b>                   | -                                           | nr                                                 | -                                                | -                                                 |
| <b>Utilization of:</b>          |                                             |                                                    |                                                  |                                                   |
| <b>Acetate</b>                  | -                                           | +                                                  | +                                                | +                                                 |
| <b>N-Acetyl-D-Glucosamine</b>   | w                                           | nr                                                 | +                                                | +                                                 |
| <b>L-Alanine</b>                | -                                           | -                                                  | +                                                | +                                                 |
| <b>L-Asparate</b>               | -                                           | +                                                  | -                                                | -                                                 |
| <b>Cellobiose</b>               | +                                           | +                                                  | +                                                | w                                                 |
| <b>Glucose</b>                  | +                                           | +                                                  | w                                                | w                                                 |
| <b>Lactate</b>                  | +                                           | nr                                                 | -                                                | -                                                 |
| <b>D-Lactose</b>                | +                                           | +                                                  | w                                                | w                                                 |
| <b>Maltose</b>                  | +                                           | +                                                  | w                                                | w                                                 |
| <b>D-Mannose</b>                | +                                           | +                                                  | -                                                | -                                                 |
| <b>Melibiose</b>                | w                                           | +                                                  | -                                                | -                                                 |
| <b>Trehalose</b>                | +                                           | +                                                  | -                                                | -                                                 |

+, Positive; w, Weakly positive; -, Negative; nr, Not reported

Data from: Denner et al. (2001), Kämpfer et al. (1997) and Xie and Yokota (2006).
